# Supplementary material
Source: publisher figshare collection journal article supplement (https://tandf.figshare.com/ndownloader/files/21295479)
Supplement: Supplementary file 1 [file 21295479]

**Supplementary Table 1. Relationship between clinical features and the immature platelet count (as above III tertile, ≥8.6*10^6/ml)**

| **Parameter** | **OR 95%CI]** | **P value** |
| --- | --- | --- |
| Male gender | 1.35[0.35-5.2] | 0.67 |
| Age >=75 years | 0.97[0.78-1.21] | 0.79 |
| Hypertension | 0.58[0.15-2.29] | 0.43 |
| Hypercholesterolemia | 0.68[0.18-2.5] | 0.56 |
| Active smoking | 2.1[0.39-10.9] | 0.39 |
| Diabetes mellitus | 1.19[0.32-4.4] | 0.79 |
| Renal failure | 1.1[0.21-5.6] | 0.91 |
| Body mass index | 1.09[0.95-1.26] | 0.22 |
| Acute coronary syndrome | 0.43[0.09-2.2] | 0.30 |
| Platelet count | 9.3[3.1-28] | <0.001 |

**Supplementary Table 2. Relationship between platelet parameters and the prevalence of coronary artery disease in patients >=75 years of age**

| **Parameter** | **OR 95%CI]** | **P value** |
| --- | --- | --- |
| IPF (%) | 0.92 [0.78-1.09] | 0.36 |
| MVP (fl) | 1.4 [0.87-2.27] | 0.17 |
| Platelets (10^6/ml) | 1.02[0.98-1.03] | 0.28 |
| IPC (10^6/ml) | 1.08[0.67-1.72] | 0.75 |
